# Supplementary material for: Biomarkers of Collagen Metabolism Are Associated with Left Ventricular Function and Prognosis in Dilated Cardiomyopathy: A Multi-Modal Study
Source: MDPI journal article supplement (doi:10.3390/jcm12175695), 2023-09-01
Supplement: s1 [file s1]

**Supplemental Figure S1. Flowchart of the study population**

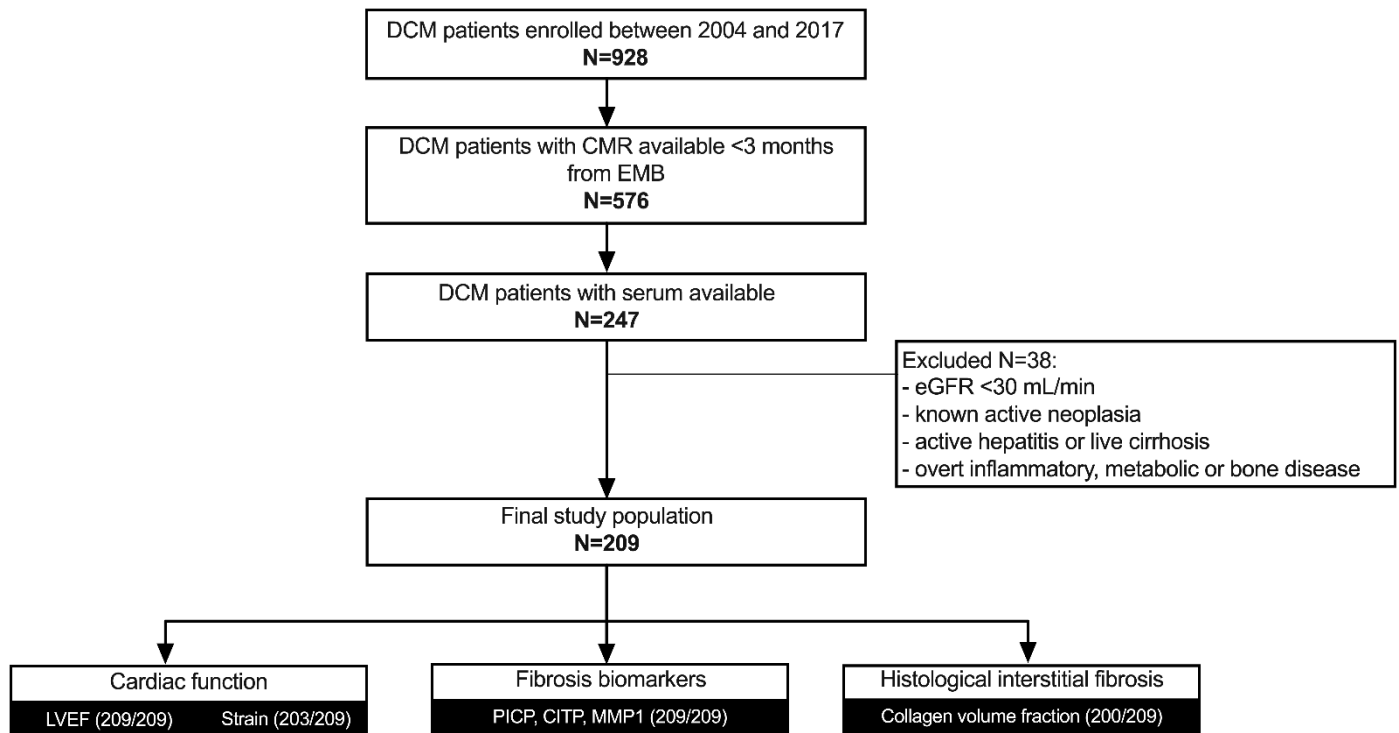

*Abbreviations: DCM: dilated cardiomyopathy, CMR: cardiac magnetic resonance imaging, GFR: glomerular filtration rate, LVEF: left ventricular ejection fraction, PICP: carboxy-terminal propeptide of procollagen type I, C1P: collagen type I fibers, MMP1: matrix metallo-proteinase.*

Supplemental Figure S2. Intraobserver variability of GLS

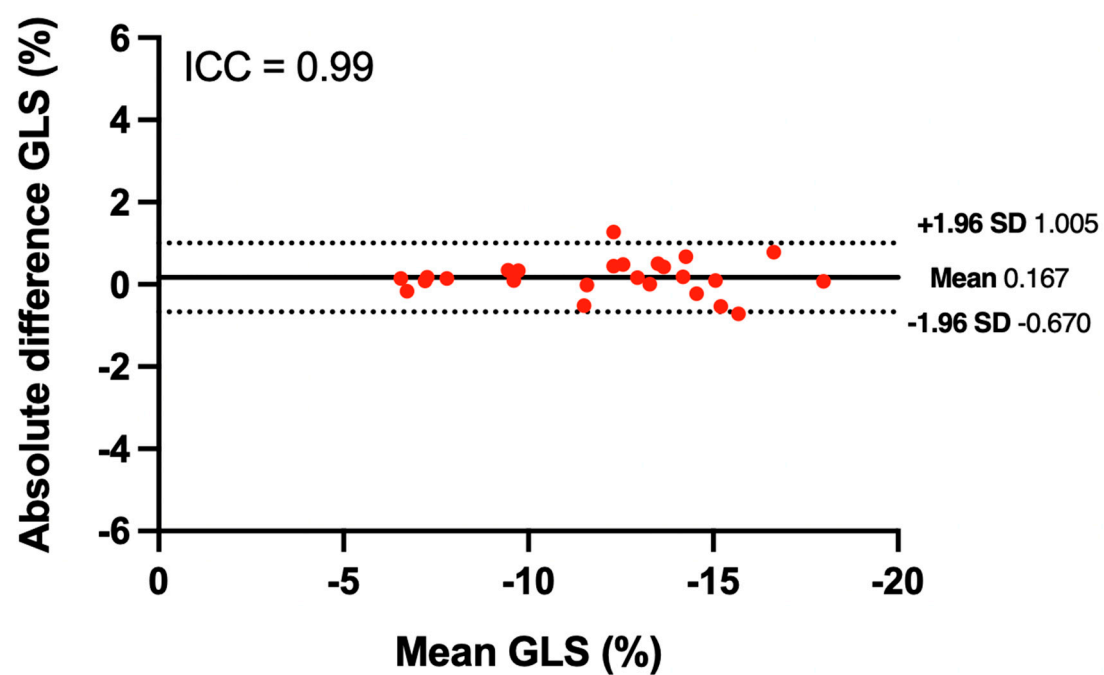

Abbreviations: GLS = global longitudinal strain, ICC = interclasss correlation coefficient, SD = standard deviation.

**Supplemental Figure S3. Associations of collagen deposition (PICP) with cardiac function parameters (LVEF and GLS)**

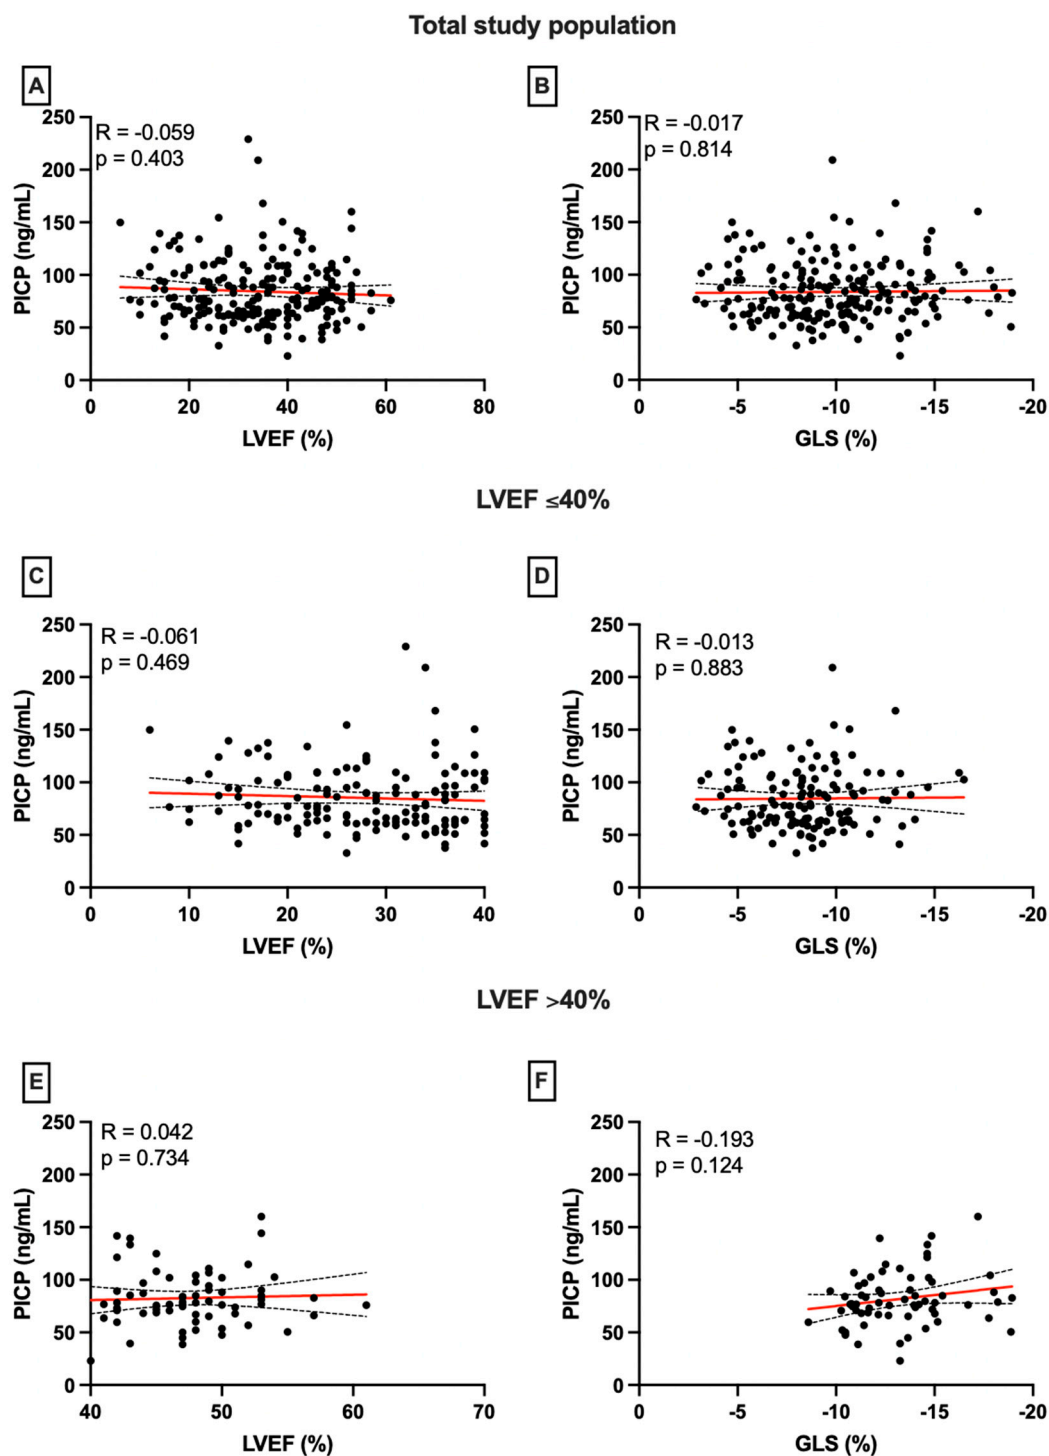

*PICP was not correlated with either LVEF or GLS.*

*Abbreviations: LVEF: left ventricular ejection fraction, GLS: global longitudinal strain, PICP: carboxy-terminal propeptide of procollagen type I.*
